# Supplementary material for: Oleuropein Enhances Stress Resistance and Extends Lifespan via Insulin/IGF-1 and SKN-1/Nrf2 Signaling Pathway in Caenorhabditis elegans
Source: MDPI journal article supplement (doi:10.3390/antiox10111697), 2021-10-27
Supplement: s1 [file s1]

**Table S1.** Lifespan summary statistics

| Treatment  | Mean Lifespan<br>± SEM (Day) | Number of<br>Worms | <i>p</i> -Value vs.<br>Control | <i>p</i> -Value vs.<br>500 µM RES | Lifespan<br>Extension (%) |
|------------|------------------------------|--------------------|--------------------------------|-----------------------------------|---------------------------|
| Control    | 15.07±0.736                  | 153                | -                              | <0.0001                           | -                         |
| 40 µM OLE  | 15.98±0.523                  | 157                | 0.0451                         | <0.0001                           | 6.03%                     |
| 180 µM OLE | 17.57±0.349                  | 155                | <0.0001                        | 0.0004                            | 16.59%                    |
| 440 µM OLE | 18.43±0.332                  | 161                | <0.0001                        | 0.0133                            | 22.29%                    |
| 500 µM RES | 19.62±0.348                  | 148                | <0.0001                        | -                                 | 30.19%                    |

The mean lifespan values were calculated by a log-rank (Mantel-Cox) statistical test.

**Table S2.** Heat and oxidative stress summary statistics

| Condition           | Treatment  | Mean<br>Lifespan<br>± SEM | Number<br>of<br>Worms | <i>p</i> -Value<br>vs.<br>Control | <i>p</i> -Value vs.<br>500 µM<br>RES | Lifespan<br>Change (%) |
|---------------------|------------|---------------------------|-----------------------|-----------------------------------|--------------------------------------|------------------------|
| Heat<br>stress      | Control    | 7.53±0.165                | 154                   | -                                 | <0.0001                              | -                      |
|                     | 40 µM OLE  | 8.12±0.115                | 150                   | 0.1065                            | <0.0001                              | 7.84                   |
|                     | 180 µM OLE | 9.40±0.056                | 157                   | <0.001                            | <0.01                                | 24.83                  |
|                     | 440 µM OLE | 10.19±0.034               | 162                   | <0.0001                           | 0.0569                               | 35.33                  |
|                     | 500 µM RES | 10.91±0.485               | 165                   | <0.0001                           | -                                    | 44.89                  |
| Oxidative<br>stress | Control    | 5.08±0.312                | 158                   | -                                 | -                                    | -                      |
|                     | 440 µM OLE | 6.59±0.164                | 154                   | <0.05                             | 0.1199                               | 29.72                  |
|                     | 500 µM RES | 7.52±0.359                | 157                   | <0.01                             | -                                    | 48.03                  |

The mean lifespan values were calculated by a log-rank (Mantel-Cox) statistical test.

**Table S3.** Lifespan summary statistics under heat stress

| Genotype                 | Treatment  | Mean Lifespan<br>± SEM (hour) | Number of<br>Worms | <i>p</i> -Value vs.<br>Control | <i>p</i> -Value vs.<br>500 µM RES |
|--------------------------|------------|-------------------------------|--------------------|--------------------------------|-----------------------------------|
| <i>daf-2 (e1370) III</i> | Control    | 11.65±0.264                   | 159                | -                              | -                                 |
|                          | 440 µM OLE | 12.17±0.163                   | 151                | 0.5640                         | 0.6841                            |
|                          | 500 µM RES | 12.20±0.100                   | 157                | 0.8607                         | -                                 |
| <i>age-1 (hx546) II</i>  | Control    | 7.76±0.312                    | 163                | -                              | -                                 |
|                          | 440 µM OLE | 8.84±0.624                    | 166                | 0.3030                         | 0.2769                            |
|                          | 500 µM RES | 7.70±0.633                    | 161                | 0.9470                         | -                                 |
| <i>sgk-1 (ok538) X</i>   | Control    | 4.91±0.210                    | 155                | -                              | -                                 |
|                          | 440 µM OLE | 5.15±0.290                    | 152                | 0.8295                         | 0.0037                            |
|                          | 500 µM RES | 6.29±0.170                    | 158                | <0.01                          | -                                 |
| <i>akt-2 (ok393) X</i>   | Control    | 4.66±0.201                    | 155                | -                              | -                                 |
|                          | 440 µM OLE | 5.76±0.275                    | 167                | <0.05                          | 0.9118                            |
|                          | 500 µM RES | 5.72±0.094                    | 154                | <0.05                          | -                                 |
| <i>daf-16 (mu86)</i>     | Control    | 6.18±0.410                    | 150                | -                              | -                                 |
|                          | 440 µM OLE | 5.81±0.470                    | 159                | 0.6579                         | 0.6210                            |
|                          | 500 µM RES | 6.27±0.330                    | 154                | 0.7784                         | -                                 |
| <i>skn-1 (zu67) IV</i>   | Control    | 5.50±0.298                    | 157                | -                              | -                                 |
|                          | 440 µM OLE | 5.27±0.408                    | 160                | 0.6315                         | 0.7623                            |

|                 |                  |     |        |   |
|-----------------|------------------|-----|--------|---|
| 500 $\mu$ M RES | 5.44 $\pm$ 0.206 | 159 | 0.8567 | - |
|-----------------|------------------|-----|--------|---|

---

The mean lifespan values were calculated by a log-rank (Mantel-Cox) statistical test.
